# Supplementary material for: A recent large-scale intraspecific IR expansion and evolutionary dynamics of the plastome of Peucedanum japonicum
Source: PubMed Central journal article supplement — Sci Rep. 2025 Jan 2;15:104. doi: 10.1038/s41598-024-84540-8 (PMC11696177; doi:10.1038/s41598-024-84540-8), 2025-01-02
Supplement: 41598_2024_84540_MOESM1_ESM.pdf [file 41598_2024_84540_MOESM1_ESM.pdf]

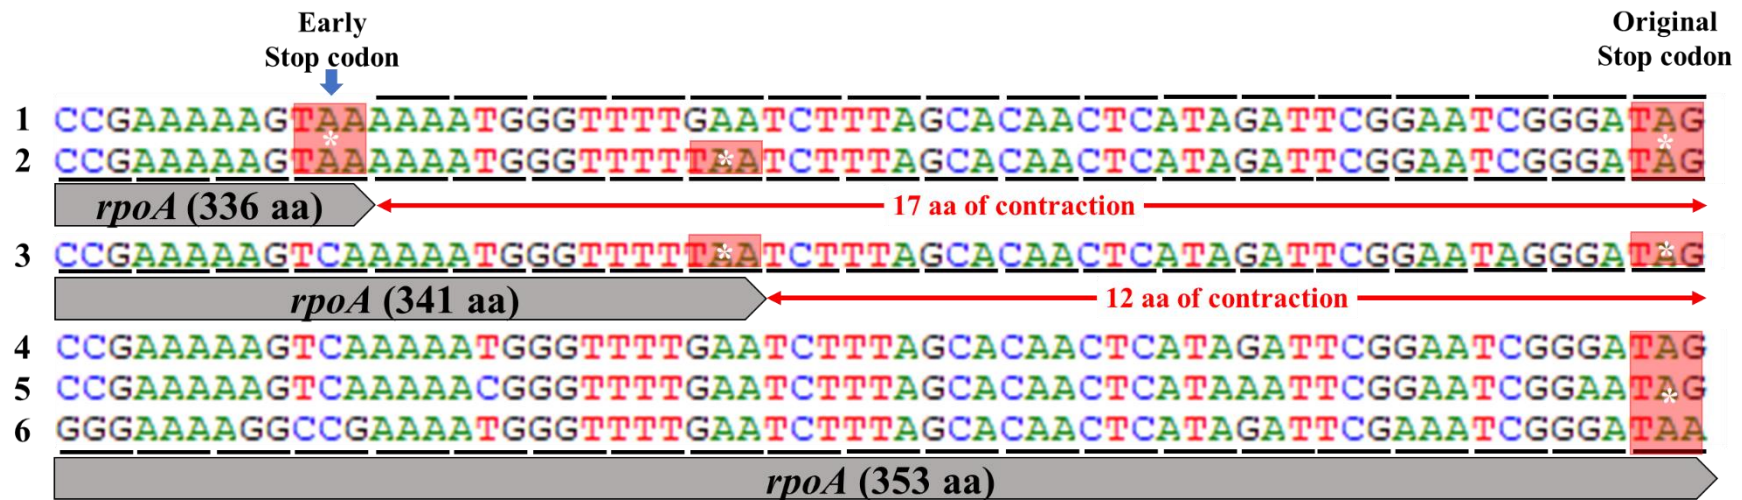

**Supplementary Figure S1. Early termination of the *rpoA* gene in the PJ plastomes by an internal stop codon.** Blue arrow indicates nucleotide transversion (cytosine to adenine) occurred in Pj-1, Pj-2, Pj-3, Pj-4, Pj-5, Pj-9 and Pj-10 induced early termination point occurrence. 1: Pj-1, Pj-2, Pj-3, Pj-4, and Pj-5, 2: Pj-9 and Pj-10, 3: *A. tsinlingensis*, 4: Pj-4, Pj-5, Pj-6, *P. ampliatum*, *P. harry-smithii* var. *grande*, *P. praeuportum*, *P. longshengense*, *L. seseloides*, *S. divaricata*, *P. mashanense*, *P. medicum*, and *C. sativum*, 5: *A. leptophyllum*, 6: *D. carota*

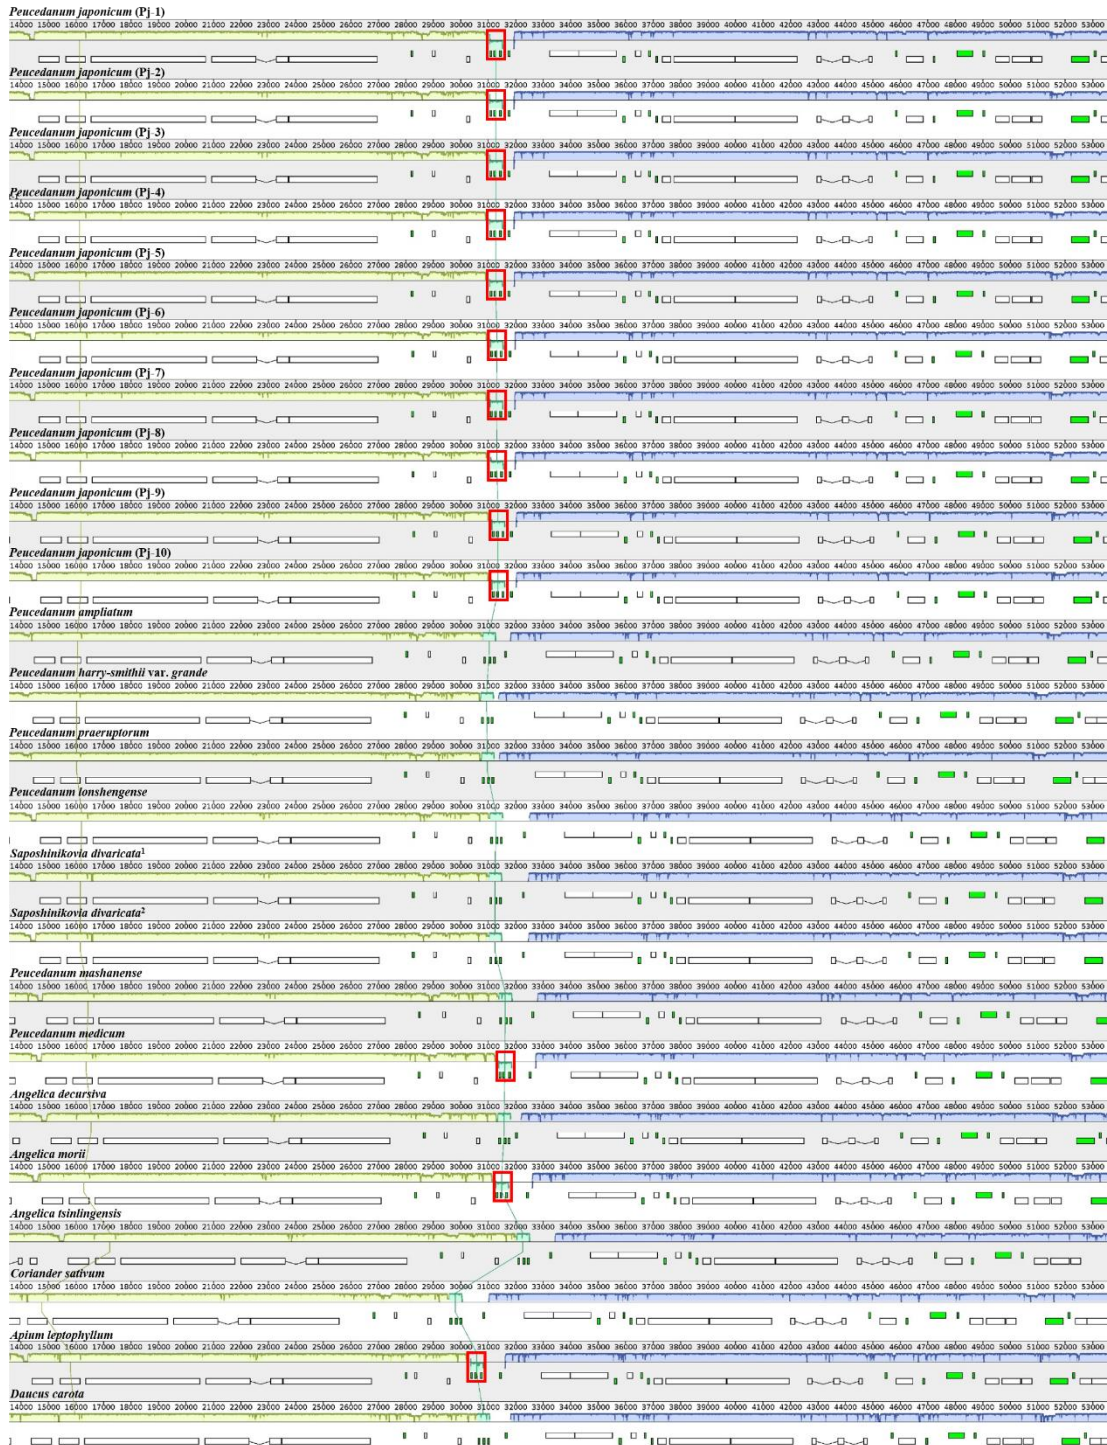

**Supplementary Figure S2. Inversion of *trnD-trnY-trnE* genes in plastomes of PJ and its related species.** The Mauve alignment result was utilized to detect inverted regions. In ten PJ accessions, *P. medicum*, *A. morii*, and *A. leptophyllum*, inverted regions of *trnD-trnY-trnE* genes were observed. Inverted regions of each species were marked with red line box.

**A) Plastid**

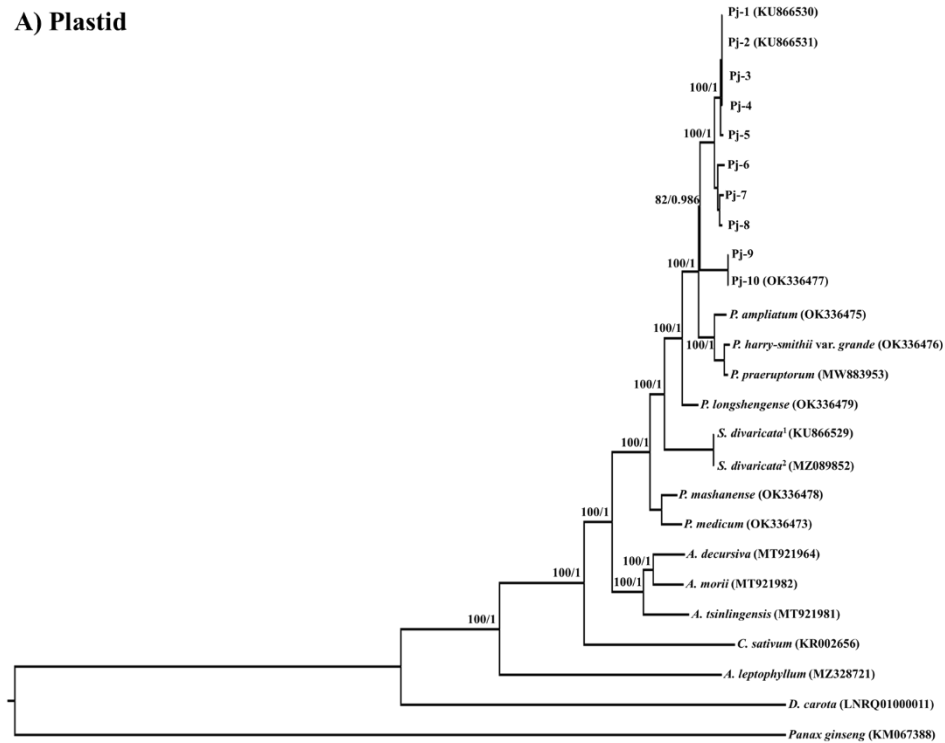

**B) ITS (ITS1-5.8S-ITS2)**

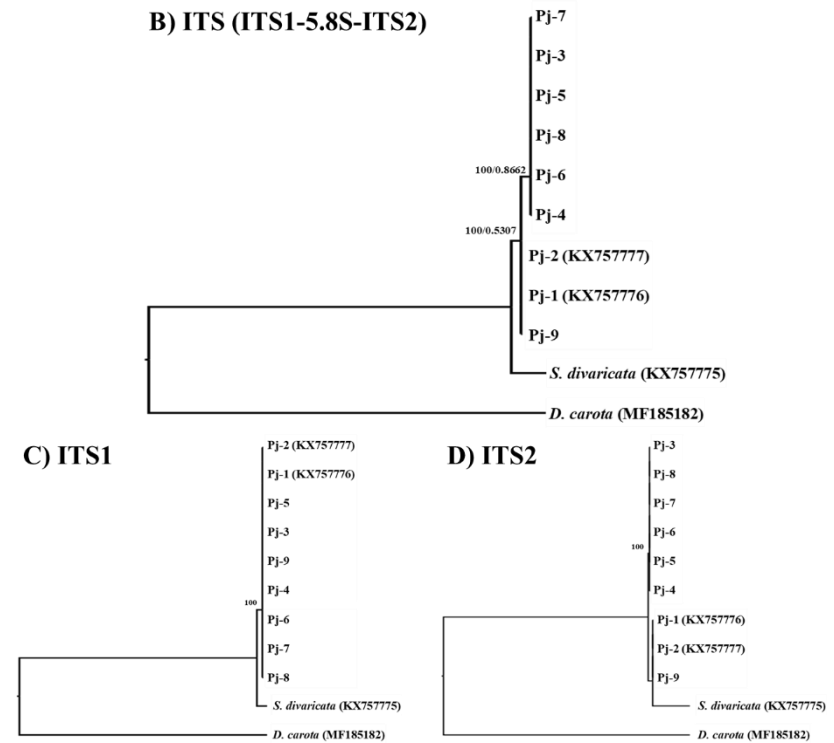

**Supplementary Figure S3. Phylogenetic relationship from ML and BI methods using plastid CDS sequences and ITS regions.** Bootstrap support value and posterior probabilities (BP/PP) are shown above the branches. A) Topology of a plastome-based tree used 76 plastid gene sequences. B) Topology of a ITS-based tree used internal transcribed spacers (ITS1 and ITS2) and 5.8S rDNA. C) Topology of a ITS1 tree. D) Topology of a ITS2 tree. The topology of the ML tree was used for the ITS1 and ITS2 trees, as the polytomy of the BI tree.

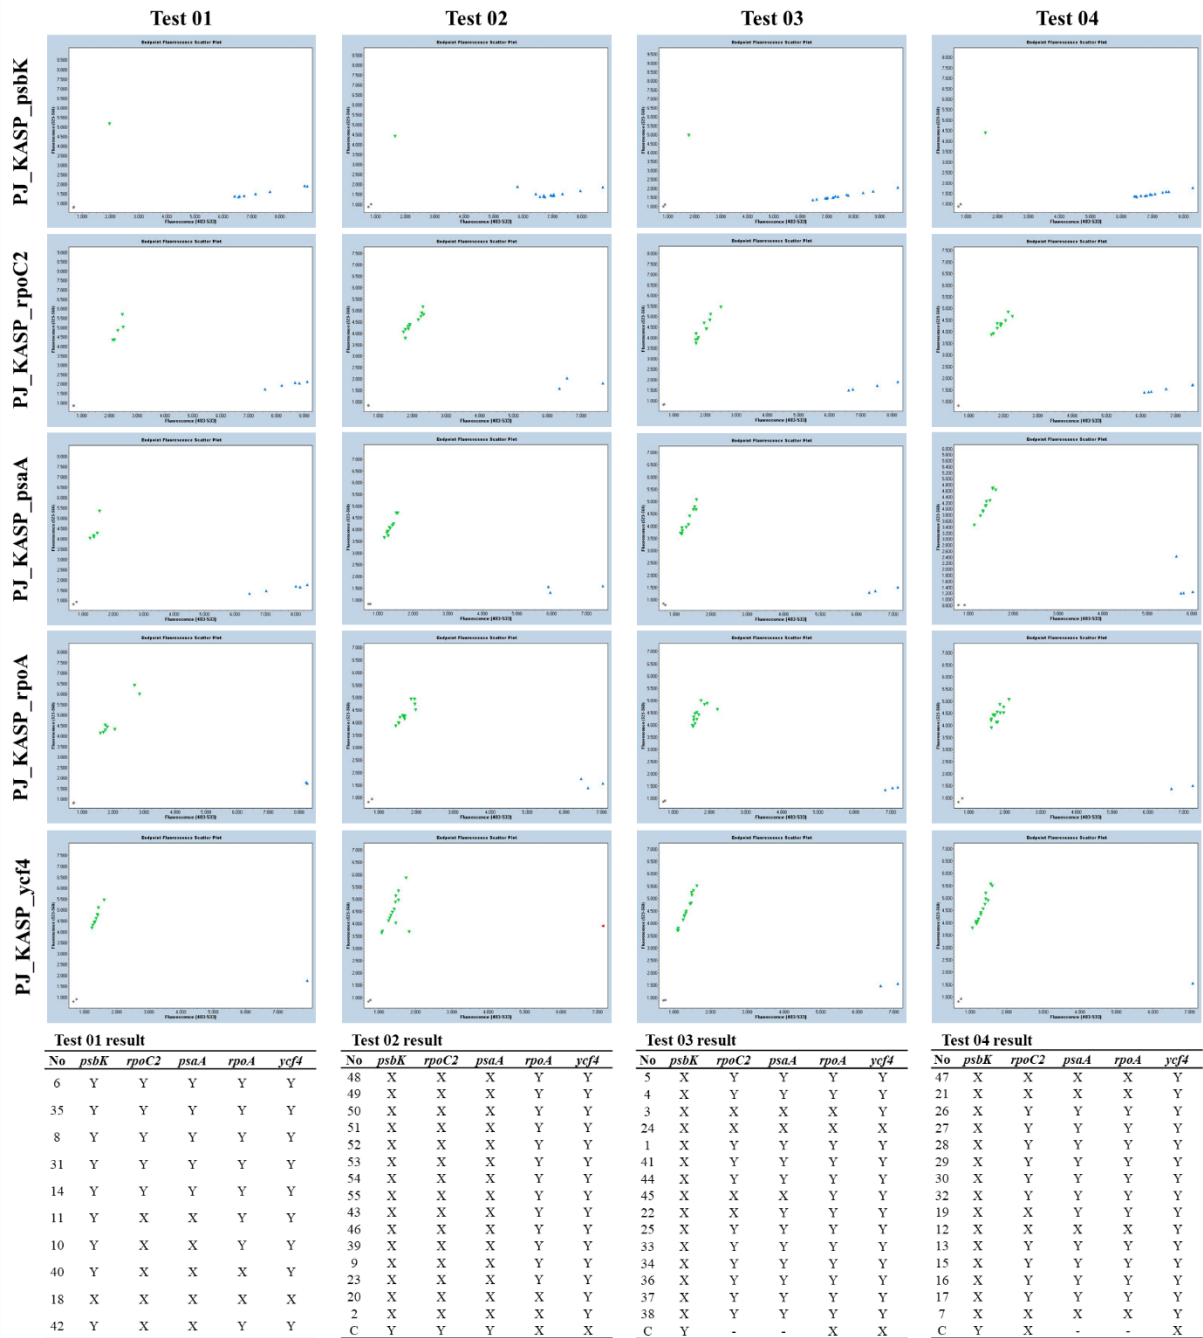

**Supplementary Figure S4. Whole KASP marker plots and its genotyping results. X and Y genotypes were marked A and B respectively in Fig 5. C is control.**

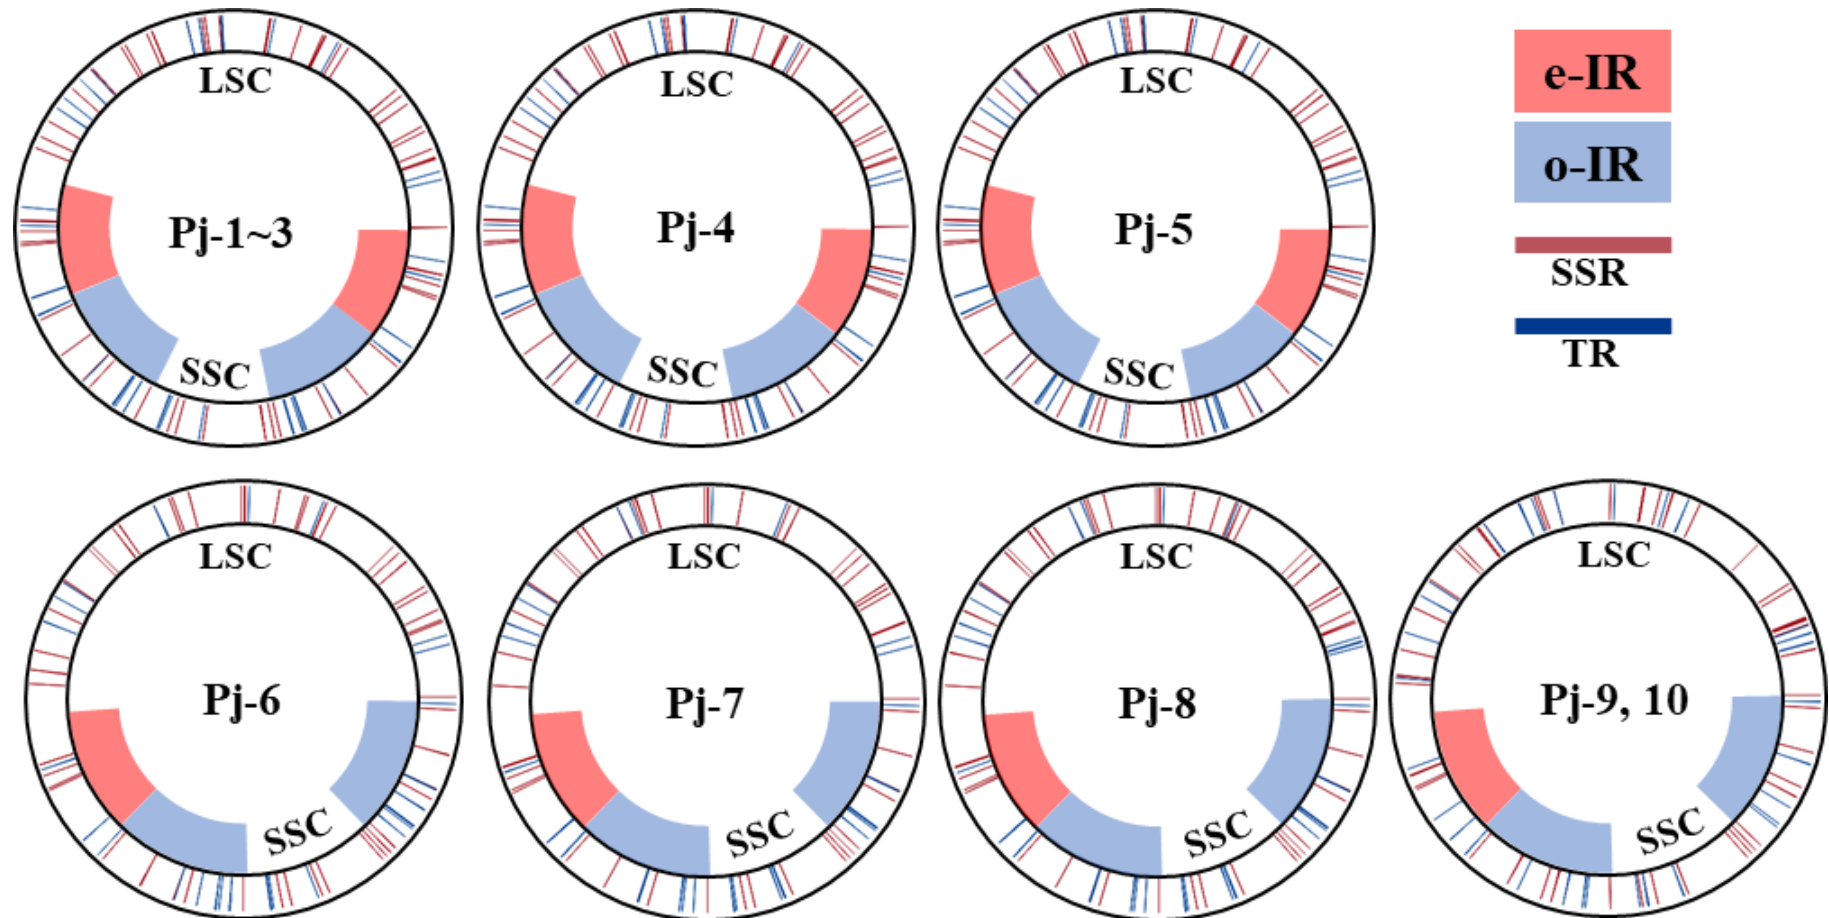

**Supplementary Figure S5. Repeat distribution in the plastomes of *P. japonicum*.** Red lines indicate SSR (simple sequence repeat) and blue lines indicate TR (tandem repeat). Red and blue shadows indicate e-IR (expanded IR) and o-IR (original IR), respectively. L-type plastomes (Pj-1~5) have expanded IR regions (eIR and o-IR), while S-type plastomes (Pj-6~10) have original form (o-IR).

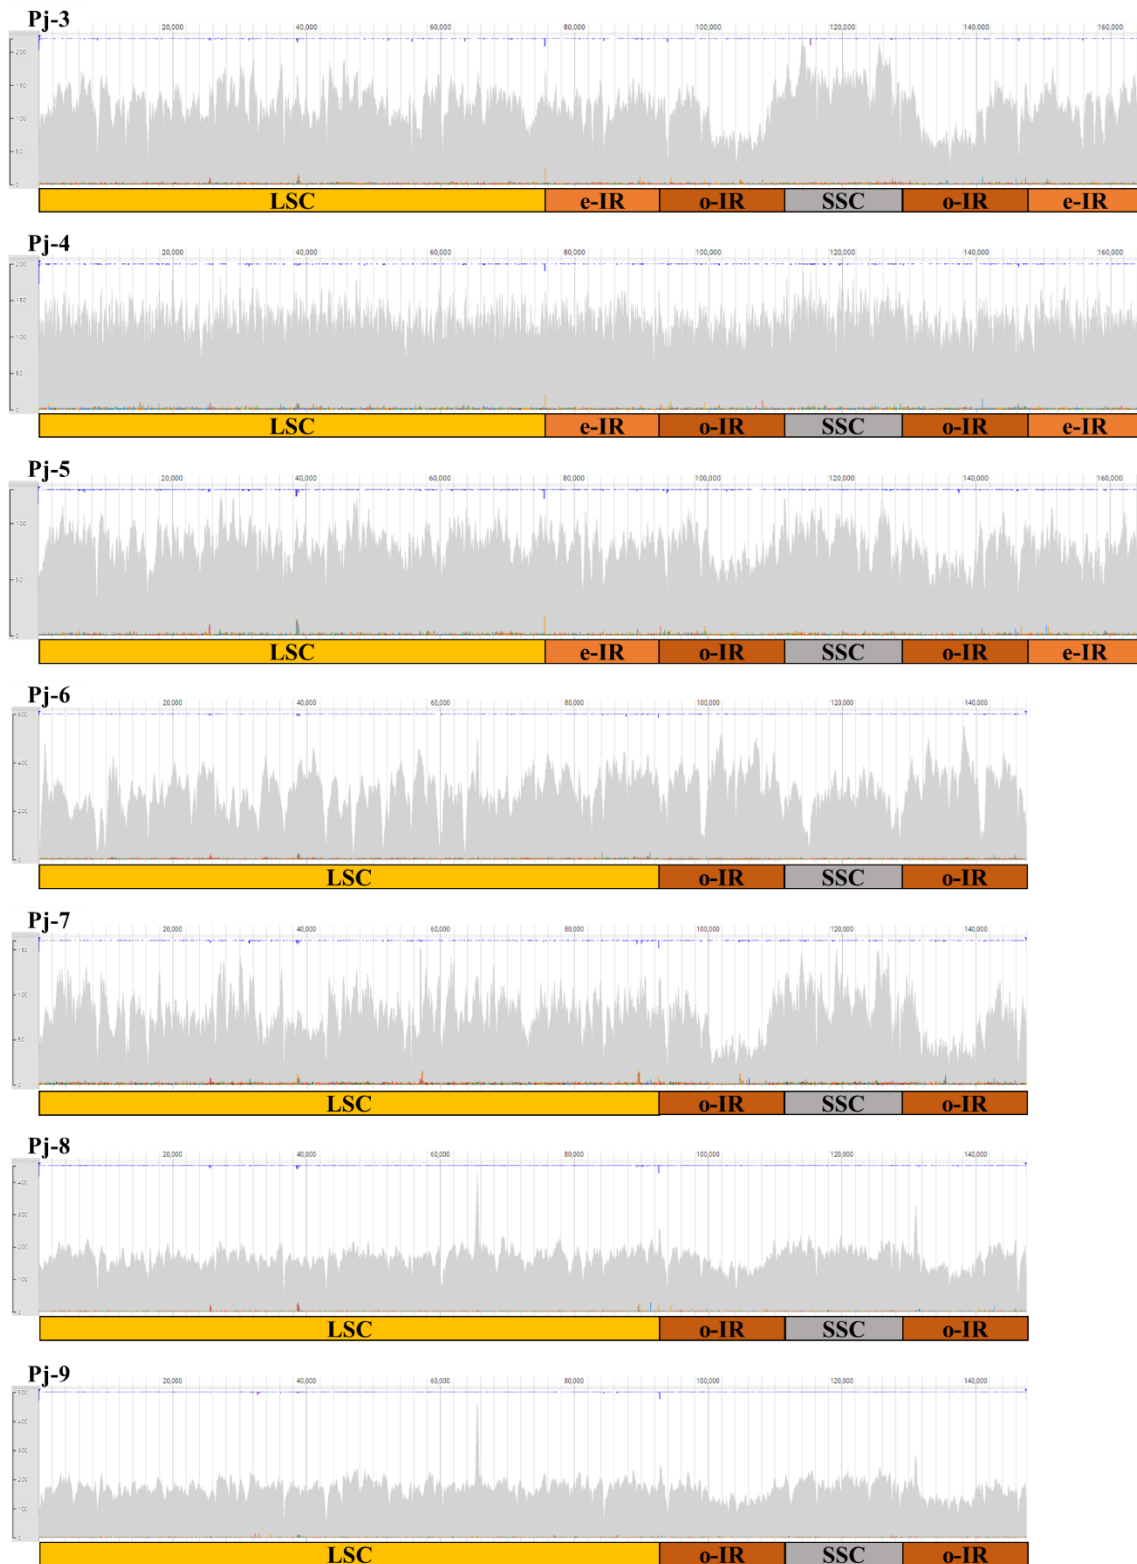

**Supplementary Figure S6. Validation of the seven newly assembled PJ plastomes.** The grey shadow regions displayed the coverage, while the colored lines below the bottom lines indicated the variations in the assembled results.

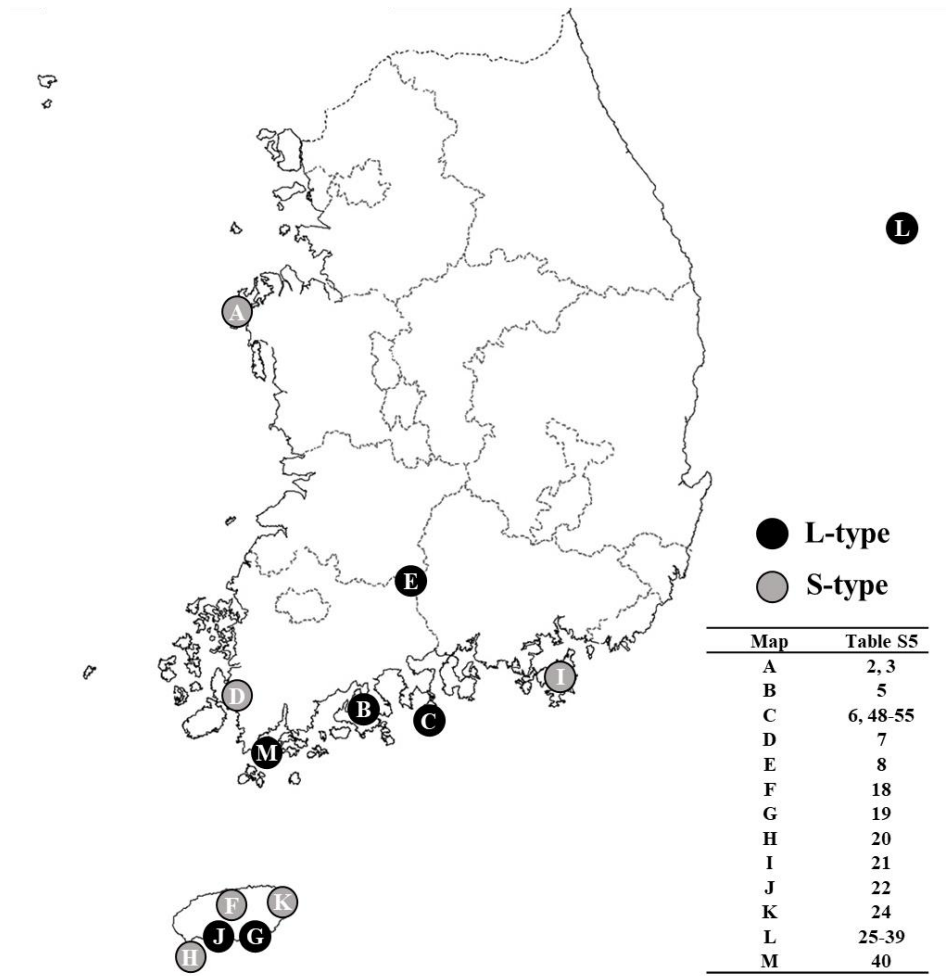

**Supplementary Figure S7. Collected sample information used in this study.** Black-colored circles and gray-colored circles indicate the collected site in South Korea and indicate L-type and S-type, respectively. The table bottom right indicates the collected site and detail ID information marked on Supplementary Table S5.
