# Supplementary material for: A recent large-scale intraspecific IR expansion and evolutionary dynamics of the plastome of Peucedanum japonicum
Source: PubMed Central journal article supplement — Sci Rep. 2025 Jan 2;15:104. doi: 10.1038/s41598-024-84540-8 (PMC11696177; doi:10.1038/s41598-024-84540-8), 2025-01-02
Supplement: 41598_2024_84540_MOESM2_ESM.pdf [file 41598_2024_84540_MOESM2_ESM.pdf]

**Supplementary Table S1. 45S nrDNA information of nine PJ accessions used in this study.**

| Accession | Length (bp) | 18S (bp) | ITS1 (bp) | 5.8S (bp) | ITS2 (bp) | 26S (bp) | GenBank accession |
|-----------|-------------|----------|-----------|-----------|-----------|----------|-------------------|
| Pj-1      | 5,815       | 1,809    | 220       | 156       | 229       | 3,401    | KX757776          |
| Pj-2      | 5,815       | 1,809    | 220       | 156       | 229       | 3,401    | KX757777          |
| Pj-3      | 5,815       | 1,809    | 220       | 156       | 229       | 3,401    | PQ288681*         |
| Pj-4      | 5,815       | 1,809    | 220       | 156       | 229       | 3,401    | PQ288682*         |
| Pj-5      | 5,815       | 1,809    | 220       | 156       | 229       | 3,401    | PQ288683*         |
| Pj-6      | 5,815       | 1,809    | 220       | 156       | 229       | 3,401    | PQ288684*         |
| Pj-7      | 5,815       | 1,809    | 220       | 156       | 229       | 3,401    | PQ288685*         |
| Pj-8      | 5,815       | 1,809    | 220       | 156       | 229       | 3,401    | PQ288686*         |
| Pj-9      | 5,815       | 1,809    | 220       | 156       | 229       | 3,401    | PQ288687*         |

\*: Newly assembled in this study

Supplementary Table S2. Variants and heterozygous positions of 45S nrDNA among PJ.

| Heterozygous Position   | Pj-1 and Pj-2 (KX757776~7) | Pj-3                              | Pj-4                   | Pj-5                   | Pj-6                  | Pj-7                   | Pj-8                   | Pj-9                   |
|-------------------------|----------------------------|-----------------------------------|------------------------|------------------------|-----------------------|------------------------|------------------------|------------------------|
| 669                     | C                          | C                                 | C                      | C                      | C                     | C                      | <b>C(88.4)/T(11.6)</b> | C                      |
| 1512                    | C                          | C                                 | C                      | C                      | C                     | C                      | <b>C(95.0)/T(5.0)</b>  | C                      |
| 1520                    | G                          | G                                 | G                      | G                      | <b>G(94.0)/A(5.8)</b> | G                      | G                      | G                      |
| 1876                    | C                          | <b>C(92.5)/T(7.2)<sup>b</sup></b> | C                      | C                      | C                     | C                      | C                      | C                      |
| <b>2160<sup>a</sup></b> | C                          | T                                 | <b>T(77.9)/C(22.1)</b> | T                      | T                     | <b>T(57.8)/C(42.2)</b> | T                      | C                      |
| 2198                    | G                          | G                                 | G                      | G                      | G                     | G                      | <b>G(83.2)/T(16.8)</b> | G                      |
| 2199                    | C                          | C                                 | C                      | C                      | C                     | C                      | <b>C(94.8)/T(5.2)</b>  | C                      |
| <b>2213</b>             | A                          | T                                 | <b>T(77.2)/A(22.7)</b> | T                      | T                     | <b>T(59.0)/A(41.0)</b> | T                      | A                      |
| 2293                    | C                          | <b>C(93.7)/T(6.0)</b>             | C                      | C                      | C                     | C                      | C                      | C                      |
| 2366                    | A                          | A                                 | A                      | <b>A(86.0)/G(13.6)</b> | A                     | A                      | A                      | A                      |
| 2405                    | G                          | G                                 | G                      | G                      | G                     | G                      | <b>G(90.8)/A(9.1)</b>  | G                      |
| 3038                    | A                          | A                                 | A                      | <b>A(84.2)/T(15.6)</b> | A                     | A                      | A                      | A                      |
| <b>3802</b>             | T                          | C                                 | <b>C(79.2)/T(20.8)</b> | C                      | C                     | <b>T(59.8)/C(39.3)</b> | C                      | T                      |
| 3804                    | C                          | C                                 | C                      | C                      | C                     | C                      | C                      | <b>C(83.7)/T(16.0)</b> |
| 3848                    | C                          | <b>C(93.3)/T(6.3)</b>             | C                      | C                      | C                     | C                      | C                      | C                      |
| 3900                    | A                          | A                                 | A                      | <b>A(79.4)/T(20.4)</b> | A                     | A                      | A                      | A                      |
| 4028                    | C                          | <b>C(94.6)/T(5.4)</b>             | C                      | C                      | C                     | C                      | C                      | C                      |
| <b>4047</b>             | C                          | <b>T(55.2)/C(44.8)</b>            | <b>T(72.4)/C(27.6)</b> | <b>C(87.8)/T(11.8)</b> | <b>C(94.4)/T(5.3)</b> | <b>C(81.2)/T(18.8)</b> | C                      | C                      |
| 5129                    | G                          | G                                 | <b>G(93.7)/T(5.7)</b>  | G                      | G                     | G                      | G                      | G                      |
| 5478                    | C                          | C                                 | C                      | C                      | C                     | C                      | <b>C(81.1)/T(18.8)</b> | C                      |
| 5525                    | T                          | T                                 | T                      | <b>T(93.4)/C(6.6)</b>  | T                     | T                      | T                      | T                      |

a: Bold letters denote SNP regions in Heterozygous position.

b: Bold letters denote heterozygous composition. The letter represents a nucleotide, while the number surrounded in a round bracket denotes reads percentage of the position.

**Supplementary Table S3. Synonymous-substitution rates ( $d_s$ ) of each gene belonged in different compartments.**

| Compartment<br>Number of CDS       | Whole PT<br>76 CDS | LSC<br>49 CDS | SSC<br>11 CDS | e-IR<br>14 CDS | o-IR<br>2 CDS |
|------------------------------------|--------------------|---------------|---------------|----------------|---------------|
| Pj-1*                              | 0.1177             | 0.1285        | 0.168         | 0.0743         | 0.0118        |
| Pj-2*                              | 0.1177             | 0.1285        | 0.168         | 0.0743         | 0.0118        |
| Pj-3*                              | 0.1177             | 0.1285        | 0.168         | 0.0743         | 0.0118        |
| Pj-4*                              | 0.1177             | 0.1285        | 0.168         | 0.0743         | 0.0118        |
| Pj-5*                              | 0.1179             | 0.1289        | 0.1675        | 0.0743         | 0.0118        |
| Pj-6                               | 0.1179             | 0.1286        | 0.1668        | 0.0753         | 0.0117        |
| Pj-7                               | 0.1174             | 0.1281        | 0.1669        | 0.0743         | 0.0117        |
| Pj-8                               | 0.1175             | 0.1284        | 0.1668        | 0.0742         | 0.0117        |
| Pj-9                               | 0.1177             | 0.1281        | 0.1693        | 0.0748         | 0.0118        |
| Pj-10                              | 0.1177             | 0.1281        | 0.1693        | 0.0748         | 0.0118        |
| <i>Peucedanum ampliatum</i>        | 0.1177             | 0.1285        | 0.1676        | 0.0744         | 0.0117        |
| <i>Peucedanum harry-smithii</i>    | 0.1181             | 0.1284        | 0.1681        | 0.0764         | 0.0118        |
| <i>Peucedanum praeruptorum</i>     | 0.1178             | 0.128         | 0.1673        | 0.0763         | 0.0118        |
| <i>Peucedanum longshengense</i>    | 0.1162             | 0.1264        | 0.1669        | 0.0738         | 0.0118        |
| <i>Saposhnikovia divaricata-1</i>  | 0.1173             | 0.1268        | 0.1709        | 0.0758         | 0.0118        |
| <i>Saposhnikovia divaricata-2</i>  | 0.1173             | 0.1268        | 0.1709        | 0.0758         | 0.0118        |
| <i>Peucedanum mashanense</i>       | 0.1147             | 0.1254        | 0.1662        | 0.0707         | 0.0118        |
| <i>Peucedanum medicum</i>          | 0.1145             | 0.1252        | 0.1650        | 0.0705         | 0.0118        |
| <i>Angelica decursiva</i>          | 0.1161             | 0.1258        | 0.1713        | 0.0723         | 0.0141        |
| <i>Angelica morii</i> <sup>+</sup> | 0.1148             | 0.1243        | 0.1700        | 0.0719         | 0.0118        |
| <i>Angelica tsinlingensis</i> *    | 0.1152             | 0.1249        | 0.1717        | 0.0710         | 0.0118        |
| <i>Coriander sativum</i>           | 0.1182             | 0.1279        | 0.1735        | 0.0707         | 0.0332        |
| <i>Apium leptophyllum</i>          | 0.1189             | 0.1292        | 0.1837        | 0.0691         | 0.0141        |
| <i>Daucus carota</i>               | 0.1265             | 0.1351        | 0.1990        | 0.0780         | 0.0187        |
| Mean $d_s$                         | 0.1175             | 0.1278        | 0.1704        | 0.0738         | 0.0132        |
| Max $d_s$                          | 0.1265             | 0.1351        | 0.1990        | 0.0780         | 0.0332        |
| Min $d_s$                          | 0.1145             | 0.1243        | 0.1650        | 0.0691         | 0.0117        |

\*: 17 kbp of IR expansion

+: 7 kbp of IR expansion

LSC/IR: LSC in S-type plastomes and IR in L-type plastomes

**Supplementary Table S4. KASP marker information used in this study.**

| Name          | Position     | Allele | Allele-specific primer (5' >3')              | Common primer (5' > 3')       |
|---------------|--------------|--------|----------------------------------------------|-------------------------------|
| PJ_KASP_psbK  | <i>psbK</i>  | FAM X  | CATTTGTCTTAATTATGCCTTTTATTCGA[ <b>G</b> ]    | CGGGCAATTTGGCGAAGAAAAGACTA    |
|               |              | HEX Y  | GCATTTGTCTTAATTATGCCTTTTATTCGA[ <b>A</b> ]   |                               |
| PJ_KASP_rpoC2 | <i>rpoC2</i> | FAM X  | CATTTCCATATGTAAATTCAGGTGCAT[ <b>G</b> ]      | GAAATGCACTGGAATACCGACGTGTA    |
|               |              | HEX Y  | AACATTTCCATATGTAAATTCAGGTGCAT[ <b>A</b> ]    |                               |
| PJ_KASP_psaA  | <i>psaA</i>  | FAM X  | CCTTATCCGTATCTAGCTACTGA[ <b>C</b> ]          | GTGTGAACAATGACAGTTGTGTACCATA  |
|               |              | HEX Y  | CCCTTATCCGTATCTAGCTACTGA[ <b>T</b> ]         |                               |
| PJ_KASP_ycf4  | <i>ycf4</i>  | FAM X  | AAATCGTCGCATCTTCCTCCGATT[ <b>A</b> ]         | CTTCTATTCTGACGGACTGAATATCCTTT |
|               |              | HEX Y  | CGTCGCATCTTCCTCCGATT[ <b>C</b> ]             |                               |
| PJ_KASP_rpoA  | <i>rpoA</i>  | FAM X  | GCATTTATCAATTGATTTACCGAAAAAGT[ <b>C</b> ]    | GAGTTGTGCTAAAGATTCAAACCCATTTT |
|               |              | HEX Y  | AAAGCATTTATCAATTGATTTACCGAAAAAGT[ <b>A</b> ] |                               |

**Supplementary Table S5. Sample information used in this study.**

| ID  | Collected from                             | ID  | Collected from                                                         |
|-----|--------------------------------------------|-----|------------------------------------------------------------------------|
| 1   | purchased from Aram Seed company           | 29  | Ulleung island, Ulleung-eup, Ulleung-gun, Gyeongsangbuk-do             |
| 2   | Sowon-myeon, Taean-gun, Chungcheongnam-do  | 30  | Ulleung island, Ulleung-eup, Ulleung-gun, Gyeongsangbuk-do             |
| 3   | Sowon-myeon, Taean-gun, Chungcheongnam-do  | 31  | Ulleung island, Ulleung-eup, Ulleung-gun, Gyeongsangbuk-do             |
| 4   | purchased from dong won nong san seed      | 32  | Ulleung island, Ulleung-eup, Ulleung-gun, Gyeongsangbuk-do             |
| 5   | Doyang-eup, Goheung-gun, Jeollanam-do      | 33  | Ulleung island, Ulleung-eup, Ulleung-gun, Gyeongsangbuk-do             |
| 6*  | Geumodo, Nam-myeon, Yeosu-si, Jeollanam-do | 34  | Ulleung island, Ulleung-eup, Ulleung-gun, Gyeongsangbuk-do             |
| 7*  | Songji-myeon, Haenam-gun, Jeollanam-do     | 35  | Ulleung island, Ulleung-eup, Ulleung-gun, Gyeongsangbuk-do             |
| 8   | Anui-myeon, Hamyang-gun, Gyeongsangnam-do  | 36  | Ulleung island, Ulleung-eup, Ulleung-gun, Gyeongsangbuk-do             |
| 9   | provided by Hantaek Botanical Garden       | 37  | Ulleung island, Ulleung-eup, Ulleung-gun, Gyeongsangbuk-do             |
| 10  | provided by Hantaek Botanical Garden       | 38  | Ulleung island, Ulleung-eup, Ulleung-gun, Gyeongsangbuk-do             |
| 11  | provided by Hantaek Botanical Garden       | 39  | Ulleung island, Ulleung-eup, Ulleung-gun, Gyeongsangbuk-do             |
| 12  | provided by Hantaek Botanical Garden       | 40* | Wando-eup, Wando-gun, Jeollanam-do                                     |
| 13  | provided by Hantaek Botanical Garden       | 41  | provided by the Medicinal Plant Garden of the college of Pharmacy, SNU |
| 14* | provided by Hantaek Botanical Garden       | 42  | provided by the Medicinal Plant Garden of the college of Pharmacy, SNU |
| 15  | provided by Hantaek Botanical Garden       | 43* | provided by the Medicinal Plant Garden of the college of Pharmacy, SNU |
| 16  | provided by Hantaek Botanical Garden       | 44  | provided by the Medicinal Plant Garden of the college of Pharmacy, SNU |
| 17  | provided by Hantaek Botanical Garden       | 45  | provided by the Medicinal Plant Garden of the college of Pharmacy, SNU |
| 18* | Seongsan-eup, Seogwipo-si, Jeju-do         | 46  | provided by the Medicinal Plant Garden of the college of Pharmacy, SNU |
| 19* | Namwon-eup, Seogwipo-si, Jeju-do           | 47  | provided by the Medicinal Plant Garden of the college of Pharmacy, SNU |
| 20  | Daejeong-eup, Seogwipo-si, Jeju-do         | 48  | Yeondo, Nam-myeon, Yeosu-si, Jeollanam-do                              |
| 21  | Irun-myeon, Geoje-si, Gyeongsangnam-do     | 49  | Yeondo, Nam-myeon, Yeosu-si, Jeollanam-do                              |
| 22  | Seohong-dong, Seogwipo-si, Jeju-do         | 50  | Yeondo, Nam-myeon, Yeosu-si, Jeollanam-do                              |
| 23  | purchased from worldseed                   | 51  | Yeondo, Nam-myeon, Yeosu-si, Jeollanam-do                              |
| 24  | Seongsan-eup, Seogwipo-si, Jeju-do         | 52  | Yeondo, Nam-myeon, Yeosu-si, Jeollanam-do                              |
| 25  | Ulleung-eup, Ulleung-gun, Gyeongsangbuk-do | 53  | Yeondo, Nam-myeon, Yeosu-si, Jeollanam-do                              |
| 26  | Ulleung-eup, Ulleung-gun, Gyeongsangbuk-do | 54  | Yeondo, Nam-myeon, Yeosu-si, Jeollanam-do                              |
| 27  | Ulleung-eup, Ulleung-gun, Gyeongsangbuk-do | 55  | Yeondo, Nam-myeon, Yeosu-si, Jeollanam-do                              |
| 28  | Ulleung-eup, Ulleung-gun, Gyeongsangbuk-do |     | *: accessions used for plastome assembly                               |
